# Supplementary material for: Punishment insensitivity emerges from impaired contingency detection, not aversion insensitivity or reward dominance
Source: eLife. 2019 Nov 26;8:e52765. doi: 10.7554/eLife.52765 (PMC6890457; doi:10.7554/eLife.52765)
Supplement: Source data 1. [file elife-52765-data1.xlsx]

## Sheet: Sheet1
Row	Experiment	Sex	SubjID	T_PunRate	P1_PunITIrate	P2_PunITIrate	P3_PunITIrate	P4_PunITIrate	P5_PunITIrate	P6_PunITIrate	T_UnpRate	P1_UnpITIrate	P2_UnpITIrate	P3_UnpITIrate	P4_UnpITIrate	P5_UnpITIrate	P6_UnpITIrate	P1_ShockIntensity	P2_ShockIntensity	P3_ShockIntensity	P4_ShockIntensity	P5_ShockIntensity	P6_ShockIntensity	T_PunRatio	P1_PunRatio	P2_PunRatio	P3_PunRatio	P4_PunRatio	P5_PunRatio	P6_PunRatio	P1_CondSup_Both	P2_CondSup_Both	P3_CondSup_Both	P4_CondSup_Both	P5_CondSup_Both	P6_CondSup_Both	P1_CondSup_Pun	P2_CondSup_Pun	P3_CondSup_Pun	P4_CondSup_Pun	P5_CondSup_Pun	P6_CondSup_Pun	P1_CondSup_Unp	P2_CondSup_Unp	P3_CondSup_Unp	P4_CondSup_Unp	P5_CondSup_Unp	P6_CondSup_Unp	P1_Control_Both
1	Hons1	1	5	16.6	7.269	0.111	0.076	0.077	0.019	0	17.8	10.529	8.548	18.363	24	27.348	38.206	0.3	0.4	0.4	0.4	0.5	0.5	0.483	0.408	0.013	0.004	0.003	0.001	0	0.132	0.148	0	0	0	0	0.126	0	0	0	0	0	0.137	0.11	0	0	0	0	0.522
2	Hons1	1	6	10.167	9.471	0.531	0.371	0.077	0.136	0.039	10.6	11.281	12.63	12.919	17.148	20.24	21.942	0.3	0.4	0.4	0.4	0.5	0.5	0.49	0.456	0.04	0.028	0.004	0.007	0.002	0.33	0.207	0.376	0.148	0.282	0.353	0.403	0	0	0	0	0	0.327	0.238	0.442	0.157	0.325	0.375	0.464
3	Hons1	1	7	9.733	6.916	0.212	0.275	4.642	4.996	6	11	9.949	11.865	13.882	12.706	8.4	8.924	0.3	0.4	0.4	0.4	0.5	0.5	0.469	0.41	0.018	0.019	0.268	0.373	0.402	0.145	0	0	0.112	0.215	0.126	0.126	0	0	0	0	0	0.198	0	0	0.194	0.354	0.205	0.467
4	Hons1	1	8	8.333	8.923	0.291	0.136	0.117	0.039	0.058	10	8.458	10.699	22.194	30.409	40.666	41.649	0.3	0.4	0.4	0.4	0.5	0.5	0.455	0.513	0.027	0.006	0.004	0.001	0.001	0.185	0	0	0	0.228	0	0.044	0	0	0	0	0	0.515	0	0	0	0.22	0	0.439
5	Hons1	0	11	21.033	2.024	0.418	0.513	0.136	0.136	0.195	11.233	1.254	5.091	15.908	15.417	16.408	16.003	0.3	0.3	0.3	0.3	0.4	0.4	0.652	0.617	0.076	0.031	0.009	0.008	0.012	0.573	0	0	0	0	0	0.442	0	0	0	0	0	0.438	0	0	0	0	0	0.757
6	Hons1	0	12	7.933	0.399	0.203	0.12	0.168	0.097	0.058	7.833	0.329	0.152	0.205	3.298	7.087	6.654	0.3	0.3	0.3	0.3	0.4	0.4	0.503	0.548	0.571	0.368	0.048	0.014	0.009	0.673	0.944	0	0	0	0	0.653	0.967	0	0	0	0	1	0	0	0	0	0	0.579
7	Hons1	0	13	12.2	7.249	0.122	0.038	0.039	0	0.038	19.467	10.372	0.837	8.042	14.961	16.92	13.316	0.3	0.3	0.3	0.3	0.4	0.4	0.385	0.411	0.127	0.005	0.003	0	0.003	0.328	0.758	0	0	0	0	0.255	0	0	0	0	0	0.396	0.545	0	0	0	0	0.447
8	Hons1	0	14	22.433	2.653	0.627	0.137	0.058	0.156	0.059	18.7	15.089	20.569	22.3	29.202	31.605	27.928	0.3	0.3	0.3	0.3	0.4	0.4	0.545	0.15	0.03	0.006	0.002	0.005	0.002	0.45	0.221	0.286	0.339	0.321	0.263	0.762	0	0	0	0.951	0	0.302	0.228	0.304	0.361	0.308	0.263	0.459
9	Hons1	0	15	14.7	9.167	0.363	4.757	10.052	9.1	3.452	12.767	7.45	5.981	5.871	7.545	8.17	5.366	0.3	0.3	0.3	0.3	0.4	0.5	0.535	0.552	0.057	0.448	0.571	0.527	0.392	0.112	0	0.176	0.049	0.104	0.2	0.066	0	0	0.013	0	0	0.186	0	0.242	0.095	0.175	0.18	0.457
10	Hons1	0	16	11.267	4.418	0.206	0.235	0.215	0.196	0.157	12.933	8.286	7.856	14.49	15.479	15.706	15.863	0.3	0.3	0.3	0.3	0.4	0.4	0.466	0.348	0.026	0.016	0.014	0.012	0.01	0.206	0.13	0.064	0	0	0.059	0.234	0	0	0	0	0	0.23	0.099	0.056	0	0	0.054	0.449
11	Hons2A	1	2	8.233	6.399	5.184	4.366	3.393	1.49	0.967	9.7	5.358	6.574	5.72	4.014	5.961	9.967	0.3	0.3	0.4	0.4	0.5	0.5	0.459	0.544	0.441	0.433	0.458	0.2	0.088	0.095	0	0.015	0	0	0	0.079	0	0.033	0	0	0	0.119	0	0	0	0	0	0.521
12	Hons2A	1	4	6.467	5.022	0.269	5	4.311	3.604	5.159	10.1	7.8	10.135	9.444	7.889	8.612	10.03	0.3	0.3	0.3	0.3	0.4	0.4	0.39	0.392	0.026	0.346	0.353	0.295	0.34	0.213	0	0.009	0	0.013	0.009	0.157	0	0.027	0	0.043	0.026	0.26	0	0	0	0	0	0.517
13	Hons2A	1	7	7.567	3.36	2.825	3.265	2.304	4.796	3.032	26.167	22.909	4.142	19.378	21.924	29.155	41.263	0.3	0.3	0.4	0.4	0.4	0.4	0.224	0.128	0.405	0.144	0.095	0.141	0.068	0.293	0.177	0.326	0.238	0.192	0.177	0.465	0.056	0.64	0.644	0.509	0.446	0.268	0.243	0.171	0.146	0.1	0.163	0.49
14	Hons2A	1	8	10.833	6.97	5.445	6.043	2.979	5.815	5.604	7.167	5.387	4.343	6.195	6.583	10.301	9.693	0.3	0.3	0.4	0.5	0.5	0.5	0.602	0.564	0.556	0.494	0.312	0.361	0.366	0.358	0.052	0.159	0.214	0.066	0.229	0.423	0.068	0.119	0.063	0	0.025	0.203	0.016	0.115	0.185	0.053	0.181	0.524
15	Hons2A	1	9	18.433	12.406	10.398	11.194	2.404	0.755	6.72	13.167	10.737	7.14	7.881	4.582	11.424	9.949	0.3	0.3	0.4	0.5	0.5	0.5	0.583	0.536	0.593	0.587	0.344	0.062	0.403	0.125	0	0	0	0.047	0.009	0.134	0	0	0	0.443	0	0.149	0	0	0	0	0.017	0.494
16	Hons2A	0	13	5.8	1.04	0.517	3.487	3.286	3.857	4.725	6.033	4.58	7.272	6.823	6.102	6.857	8.33	0.3	0.3	0.3	0.3	0.4	0.4	0.49	0.185	0.066	0.338	0.35	0.36	0.362	0.043	0.194	0.257	0.16	0.101	0.044	0	0	0.085	0.047	0.151	0.06	0.038	0.23	0.332	0.198	0.063	0.031	0.611
17	Hons2A	0	14	9.067	6.926	5.359	4.851	5.378	7.155	1.383	9.933	7.235	4.292	3.957	7.026	7.242	9.823	0.3	0.3	0.4	0.4	0.5	0.6	0.477	0.489	0.555	0.551	0.434	0.497	0.123	0.148	0.03	0.146	0.068	0.029	0.071	0.216	0.053	0.058	0	0	0.237	0.089	0	0.137	0.083	0.043	0.036	0.493
18	Hons2A	0	16	10.3	3.462	0.797	1.623	3.052	4.277	4.154	13.7	6.989	6.14	9.349	8.159	9.66	9.881	0.3	0.3	0.3	0.3	0.3	0.4	0.429	0.331	0.115	0.148	0.272	0.307	0.296	0.157	0.044	0.159	0.155	0.282	0.167	0.08	0	0	0.197	0.49	0.37	0.208	0.03	0.132	0.087	0.077	0.02	0.488
19	Hons2A	0	17	6.533	6.629	1.706	3.714	1.503	3.479	3.724	7.1	4.217	3.623	5.688	7.517	7.625	5.255	0.3	0.3	0.3	0.4	0.4	0.4	0.479	0.611	0.32	0.395	0.167	0.313	0.415	0.262	0	0	0	0	0	0.295	0	0	0	0	0	0.178	0	0	0	0	0	0.567
20	Hons2A	0	18	8.9	0.583	0.325	0.05	0.038	0.232	0.45	6.667	0.429	0.615	0.118	3.919	7.447	7.368	0.3	0.3	0.3	0.3	0.3	0.3	0.572	0.576	0.345	0.3	0.009	0.03	0.058	0.893	0	0	0	0.135	0	0.861	0	0	0	0	0	0.8	0	0	0	0.121	0	0.826
21	Hons2A	0	20	6.9	0.411	0.067	0.05	0.05	0.233	0.136	7.033	0.394	0.067	0	0.034	6.699	10.714	0.3	0.3	0.3	0.3	0.3	0.3	0.495	0.511	0.5	1	0.6	0.034	0.013	0.897	0	0	0	0	0	0	0	0	0	0	0	0.4	0	0	0	0	0	0.949
22	Hons2A	0	23	7	4.124	1.861	3.618	3.614	1.938	4.176	6.333	5.847	4.892	7.412	6.572	5.896	7.604	0.3	0.3	0.3	0.3	0.4	0.4	0.525	0.414	0.276	0.328	0.355	0.247	0.354	0.214	0.159	0.245	0.342	0.192	0.23	0.148	0.163	0.038	0	0	0	0.355	0.132	0.34	0.486	0.198	0.306	0.498
23	Hons2B	1	5	15.367	1.096	0.448	0.195	0.237	8.418	11.615	14.7	13.395	21.857	20.189	21.591	18.515	17.094	0.3	0.3	0.3	0.3	0.3	0.4	0.511	0.076	0.02	0.01	0.011	0.313	0.405	0.033	0	0	0.186	0.068	0.03	0	0	0	0	0	0.011	0.057	0	0	0.219	0.114	0.05	0.395
24	Hons2B	1	6	9.767	5.234	3.204	6.574	4.857	5.469	5.387	8.533	5.19	14.624	5.89	5.451	5.69	5.321	0.3	0.3	0.3	0.4	0.4	0.5	0.534	0.502	0.18	0.527	0.471	0.49	0.503	0.155	0.372	0.299	0	0	0	0.135	0.566	0.186	0	0	0	0.193	0.264	0.373	0	0	0	0.5
25	Hons2B	0	15	9.533	1.49	0.153	0.312	0.273	9.393	7.8	8.767	3.392	6.096	9.312	9.409	9.685	8.422	0.3	0.3	0.3	0.3	0.3	0.4	0.521	0.305	0.025	0.032	0.028	0.492	0.481	0.465	0	0	0.11	0.235	0.192	0.624	0	0	0	0.013	0	0.547	0	0	0.125	0.368	0.33	0.387
26	Hons2B	0	19	9.667	1.752	0.293	6.225	7.016	11.034	12.47	14.7	12.826	18.078	17.011	17.114	13.326	10.366	0.3	0.3	0.3	0.3	0.3	0.4	0.397	0.12	0.016	0.268	0.291	0.453	0.546	0.127	0	0	0.011	0.005	0	0.168	0	0	0.036	0.012	0	0.105	0	0	0	0	0	0.551
27	Hons2B	0	21	18.733	12.494	5.889	8.15	4.484	2.841	4.996	7.4	8.742	6.708	6.555	5.317	4.961	6.371	0.3	0.3	0.4	0.5	0.5	0.5	0.717	0.588	0.467	0.554	0.458	0.364	0.44	0.109	0.151	0.115	0.22	0.252	0.187	0.059	0.087	0.152	0.126	0.117	0.11	0.213	0.238	0.065	0.33	0.332	0.311	0.521
28	Hons2B	0	22	13.467	7.705	7.8	4.578	5.847	4.091	7.014	16.2	10.207	7.067	4.94	9.044	8.622	3.592	0.3	0.3	0.4	0.4	0.5	0.5	0.454	0.43	0.525	0.481	0.393	0.322	0.661	0.341	0.218	0.185	0.057	0.017	0.041	0.271	0.215	0.063	0.049	0.05	0.041	0.429	0.176	0.178	0.05	0	0.027	0.474
29	Hons2C	1	1	13.7	14.431	15.47	11.559	5.574	10.954	8.884	6.567	5.42	5.799	4.985	2.939	3.502	3.453	0.3	0.3	0.4	0.5	0.5	0.6	0.676	0.727	0.727	0.699	0.655	0.758	0.72	0.236	0.006	0.008	0	0.02	0	0.228	0.008	0	0	0.014	0	0.341	0	0.026	0	0.044	0	0.492
30	Hons2C	1	3	10.333	9.546	9.844	9.483	5.915	9.035	9.4	7.7	6.491	5.933	6.09	4.404	6.561	5.867	0.3	0.3	0.4	0.5	0.5	0.6	0.573	0.595	0.624	0.609	0.573	0.579	0.616	0.201	0.008	0	0	0	0	0.223	0.013	0	0	0	0	0.175	0	0	0	0	0	0.484
31	Hons2C	1	10	11.3	9.403	10.384	9.022	9.578	12.705	14.972	12.3	9.672	7.184	9.56	9.956	10.409	12.307	0.3	0.3	0.4	0.4	0.5	0.6	0.479	0.493	0.591	0.486	0.49	0.55	0.549	0.136	0.007	0.007	0	0.011	0.023	0.182	0.012	0.014	0	0.01	0.041	0.072	0	0	0	0.013	0	0.536
32	Hons2C	1	11	12.933	9.667	8.619	10.629	11.034	11.187	11.38	18.333	13	9.157	10	9.191	8.527	9.808	0.3	0.3	0.4	0.4	0.5	0.6	0.414	0.426	0.485	0.515	0.546	0.567	0.537	0.023	0	0	0	0.014	0	0.051	0	0	0	0.025	0	0	0	0	0	0	0	0.544
33	Hons2C	1	12	10.767	11.393	9.708	10.071	11.038	11.526	10.4	9.667	9.101	8.202	9.936	9.955	11.391	8.8	0.3	0.3	0.4	0.4	0.5	0.6	0.527	0.556	0.542	0.503	0.526	0.503	0.542	0.128	0.028	0.087	0.097	0.043	0.045	0.054	0	0.048	0.043	0.042	0.012	0.251	0.073	0.155	0.186	0.053	0.089	0.475
34	Hons2C	0	24	8.667	8.178	6.419	4.707	2.654	5.385	5.178	5.767	5.156	5.074	3.494	2.058	5.576	4.438	0.3	0.3	0.4	0.5	0.5	0.6	0.6	0.613	0.559	0.574	0.563	0.491	0.538	0.167	0.044	0.019	0	0.027	0.052	0.158	0.059	0	0	0	0	0.171	0.04	0.036	0	0.035	0.056	0.459
35	Philip	1	1	6.433	5.17	0.23	0.35	0.08	0.23	0.06	8.2	6.13	5.07	9.99	9.26	13.36	12.02	0.3	0.4	0.4	0.4	0.4	0.5	0.44	0.465	0.043	0.034	0.008	0.017	0.005	0.317	0	0	0	0.128	0	0.188	0	0	0	0.896	0	0.398	0	0	0	0	0	0.612
36	Philip	1	2	14.433	11.4	1.15	0.21	0.1	7.52	0.64	13.267	10.12	9.77	25.75	22.07	19.21	21.75	0.3	0.4	0.4	0.4	0.4	0.5	0.521	0.521	0.105	0.008	0.004	0.281	0.028	0.346	0.243	0	0	0.028	0	0.299	0.753	0	0	0	0	0.392	0	0	0	0.031	0	0.572
37	Philip	1	3	10.833	10.46	5.83	5.04	9.04	13.49	4.89	9.867	8.77	3.69	6.52	8.22	10.85	9.13	0.3	0.4	0.4	0.4	0.4	0.5	0.523	0.548	0.613	0.436	0.524	0.554	0.349	0.561	0.494	0.238	0.128	0.163	0.239	0.568	0.474	0.12	0.029	0.036	0.098	0.552	0.524	0.309	0.216	0.28	0.298	0.454
38	Philip	1	4	13.4	8.08	0.33	0.41	0.41	2.86	0.12	10.333	6.69	5.53	6.31	6.61	7.58	7.95	0.3	0.4	0.4	0.4	0.4	0.5	0.565	0.551	0.056	0.061	0.058	0.274	0.014	0.251	0.128	0	0	0.126	0	0.195	0	0	0	0.231	0	0.309	0.134	0	0	0.078	0	0.451
39	Philip	1	5	11.967	12.58	10.37	12.31	13.06	14.73	11.82	9.533	9.55	7.56	9.27	9.56	9.96	8.19	0.3	0.4	0.4	0.4	0.4	0.5	0.557	0.566	0.578	0.571	0.577	0.597	0.591	0.508	0.23	0.029	0.022	0.045	0.013	0.513	0.181	0.031	0.028	0.042	0.022	0.501	0.269	0.027	0.012	0.054	0	0.528
40	Philip	1	6	20.367	18.89	15.01	18.21	17.82	18.4	8.73	18.167	16.55	19.93	19.89	14.21	17.67	12.17	0.3	0.4	0.4	0.4	0.4	0.5	0.529	0.534	0.43	0.478	0.556	0.51	0.418	0.394	0.381	0.346	0.285	0.261	0.059	0.401	0.329	0.363	0.286	0.283	0.107	0.385	0.395	0.299	0.282	0.233	0.017	0.531
41	Philip	1	7	10.333	7.14	8.52	8.88	7.15	10.89	11.91	10.967	7.71	7.42	7.3	6.16	9.78	9.93	0.3	0.4	0.4	0.4	0.4	0.5	0.485	0.466	0.535	0.549	0.537	0.527	0.545	0.537	0.221	0.016	0.01	0.083	0.074	0.483	0.158	0.028	0.019	0.099	0.073	0.577	0.283	0	0	0.064	0.075	0.439
42	Philip	1	8	8.067	8.96	8.75	11.03	10.75	12.98	15.06	15.3	12.11	9.81	12.41	12.36	15.57	13.83	0.3	0.4	0.4	0.4	0.4	0.5	0.345	0.437	0.472	0.471	0.465	0.455	0.521	0.222	0	0.027	0.011	0.055	0.066	0.22	0	0	0.024	0.081	0.064	0.223	0	0.049	0	0.032	0.069	0.419
43	Philip	1	1	7.167	5.338	3.24	6.676	8.081	8.54	8.378	5.433	4.632	4.077	4.893	6.133	6.02	6.156	0.3	0.4	0.4	0.4	0.4	0.4	0.569	0.535	0.443	0.577	0.569	0.587	0.576	0.112	0.024	0	0	0	0.043	0.073	0.053	0	0	0	0.015	0.139	0	0	0	0	0.091	0.501
45	Philip	1	3	5.8	1.711	3.806	4.281	6.781	5.044	5.331	5.3	2.282	4.774	5.598	8.387	7.556	7.283	0.3	0.4	0.4	0.4	0.4	0.4	0.523	0.429	0.444	0.433	0.447	0.4	0.423	0.212	0.034	0.053	0.051	0.07	0.102	0.111	0.073	0.115	0	0	0.026	0.391	0	0	0.118	0.135	0.14	0.539
46	Philip	1	4	3.967	2.195	0.154	0.429	0.391	0.295	0.155	5.233	5.017	5.654	6.742	7.72	10.466	11.455	0.3	0.4	0.4	0.4	0.4	0.4	0.431	0.304	0.026	0.06	0.048	0.027	0.013	0.353	0	0	0	0	0	0.32	0	0	0	0	0	0.555	0	0	0	0	0	0.33
47	Philip	1	5	5.617	1.854	0.19	0.249	0.038	0.038	0.077	4.55	4.824	4.781	6.115	6.958	6.633	5.846	0.3	0.4	0.4	0.4	0.4	0.4	0.552	0.278	0.038	0.039	0.005	0.006	0.013	0.357	0	0	0	0	0	0.581	0	0	0	0	0	0.171	0	0	0	0	0	0.547
48	Philip	1	6	12.517	7.985	10.562	16.511	18.521	17.276	21.668	11.633	6.11	8.742	11.865	12.951	14.03	14.219	0.3	0.4	0.4	0.4	0.4	0.4	0.518	0.567	0.547	0.582	0.588	0.552	0.604	0.275	0.099	0.031	0.059	0.042	0.114	0.167	0.096	0.015	0.09	0.067	0.154	0.413	0.135	0.061	0.009	0.008	0.051	0.549
49	Philip	1	7	8.083	3.644	0.523	0.253	2.723	5.211	9.596	8.55	7.789	7.123	10.1	14.787	12.649	8.427	0.3	0.4	0.4	0.4	0.4	0.4	0.486	0.319	0.068	0.024	0.156	0.292	0.532	0.421	0.343	0.127	0.022	0.043	0.007	0.252	0	0	0	0	0	0.652	0.456	0.185	0.037	0.091	0.019	0.464
[truncated: 64 more columns]
